# Supplementary material for: Garcinol loaded vitamin E TPGS emulsified PLGA nanoparticles: preparation, physicochemical characterization, in vitro and in vivo studies
Source: PubMed Central journal article supplement (PMC5428804; doi:10.1038/s41598-017-00696-6), 2017-04-03
Supplement: 41598_2017_696_MOESM1_ESM.pdf [file 41598_2017_696_MOESM1_ESM.pdf]

## Garcinol loaded vitamin E TPGS emulsified PLGA nanoparticles: preparation, physicochemical characterization, *in vitro* and *in vivo* studies

Raghuvir H. Gaonkar<sup>1,+</sup>, Soumya Ganguly<sup>1,+</sup>, Saikat Dewanjee<sup>2</sup>, Samarendu Sinha<sup>3</sup>, Amit Gupta<sup>3</sup>, Shantanu Ganguly<sup>3</sup>, Dipankar Chattopadhyay<sup>4</sup> and Mita Chatterjee Debnath<sup>1,\*</sup>

<sup>1</sup>Infectious Diseases and Immunology Division, CSIR-Indian Institute of Chemical Biology, Kolkata, India.

<sup>2</sup>Department of Pharmaceutical Technology, Jadavpur University, Kolkata, India.

<sup>3</sup>Regional Radiation Medicine Center, Thakurpukur Cancer Center and Welfare Home Campus, Kolkata, India.

<sup>4</sup>Department of Polymer Science & Technology, University College of Science & Technology, University of Calcutta, Kolkata

\* Corresponding author, M.C.D. (mitacd@iicb.res.in)

+ These authors contributed equally to this work.

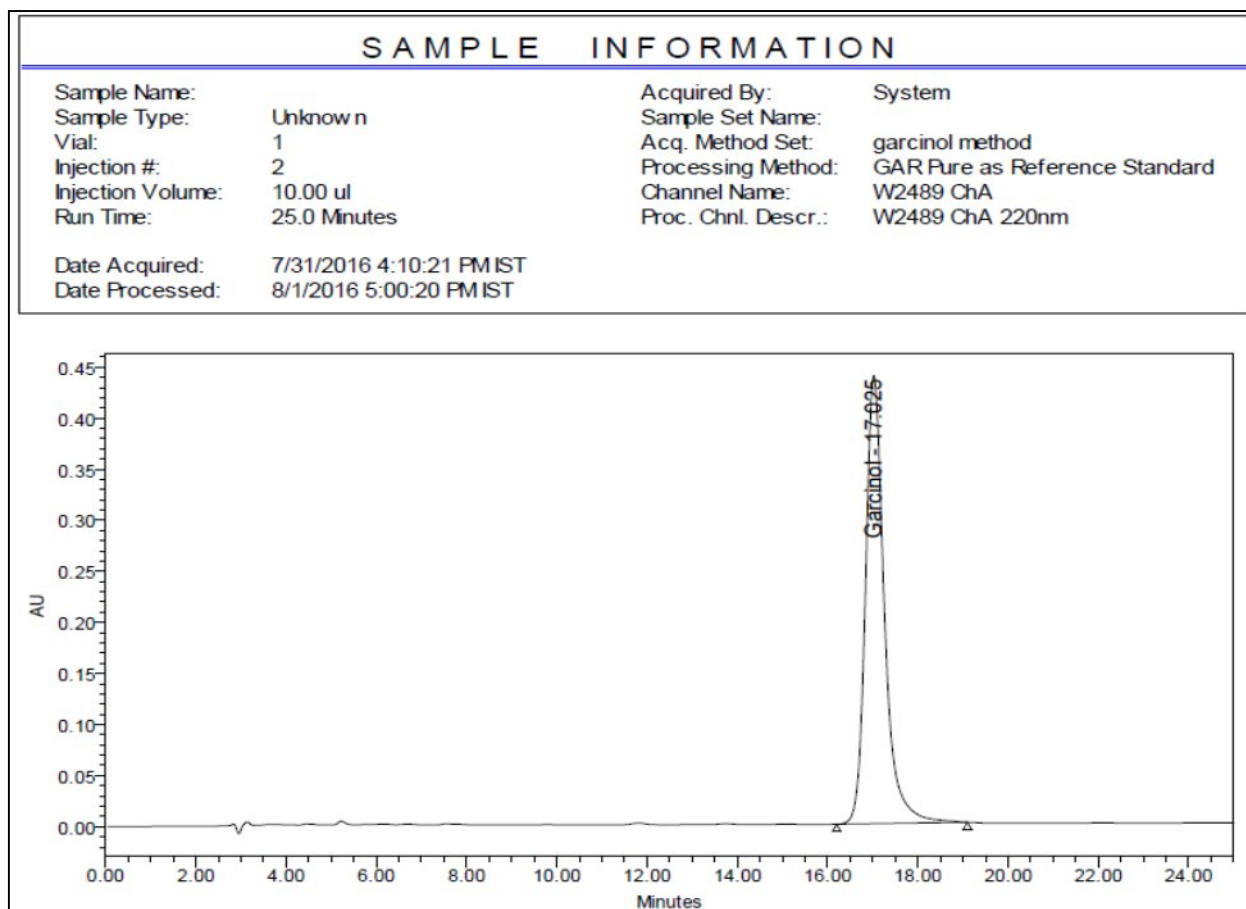

Supplementary Figure S1. HPLC chromatogram of GAR.

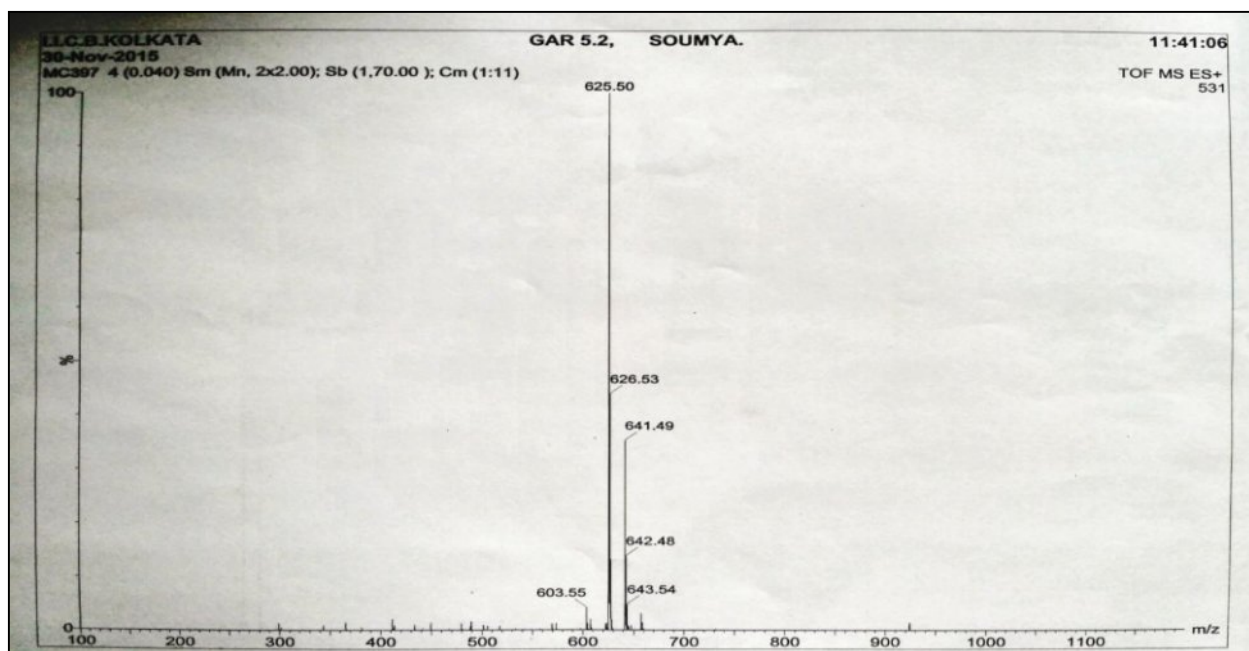

Supplementary Figure S2. ESI-Mass spectra of GAR.

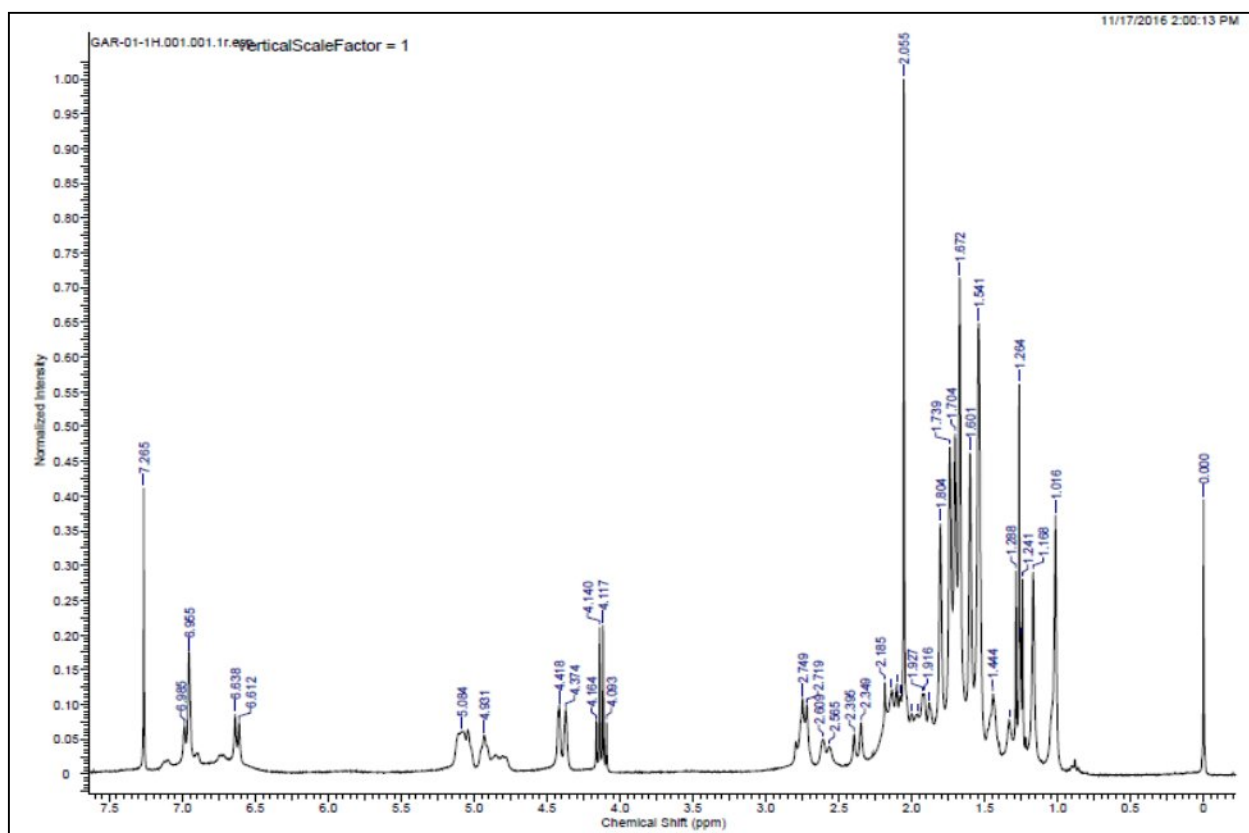

Supplementary Figure S3. <sup>1</sup>H NMR spectra of GAR.

|                                                 | <b>GAR</b> | <b>GAR-NPs</b> |
|-------------------------------------------------|------------|----------------|
| <b>Route of Administration</b>                  | Oral       | Oral           |
| <b>Dose (mg/kg b wt)</b>                        | 25         | 25             |
| <b>C<sub>max</sub> (ng/ml)</b>                  | 385        | 1814           |
| <b>T<sub>max</sub>(h)</b>                       | 0.5        | 2              |
| <b>K<sub>el</sub>(h<sup>-1</sup>)</b>           | 0.161      | 0.017          |
| <b>t<sub>1/2</sub>(h)</b>                       | 4.3        | 40.76          |
| <b>AUC<sub>0-∞</sub> (h.ng/ml)</b>              | 2721.45    | 77253.8        |
| <b>F<sub>rel</sub>(with respect to GAR-NPs)</b> | -N/A-      | 28.386         |

Note: Data for C<sub>max</sub> are represented as mean ± SD (n=5).

Abbreviations: C<sub>max</sub>, maximum concentration; T<sub>max</sub>, time at C<sub>max</sub>; AUC, area under the curve; F<sub>rel</sub>, relative bioavailability; b wt, body weight.

**Supplementary Table S4:** Pharmacokinetics parameters of free garcinol (GAR) and garcinol-loaded nanoparticles (GAR-NPs).

| <b>Solvents</b> | <b>Volume of Solvent required to dissolve 100 mg GAR (ml)</b> | <b>Comments</b> |
|-----------------|---------------------------------------------------------------|-----------------|
| Acetone         | 0.170 ± 0.32                                                  | Freely soluble  |
| Methanol        | 0.140 ± 0.16                                                  | Freely Soluble  |
| Ethanol         | 0.165 ± 0.23                                                  | Freely Soluble  |
| Chloroform      | 0.090 ± 0.41                                                  | Very Soluble    |
| Dichloromethane | 0.290 ± 0.39                                                  | Freely Soluble  |
| Ethyl Acetate   | 0.210 ± 0.28                                                  | Freely Soluble  |
| Distilled Water | 1015 ± 1.42<br>(Remains as a suspension)                      | Insoluble       |

**Supplementary Table S5:** Solubility studies of GAR as per USP specifications (The Studies have been done in triplicate).
